# Supplementary material
Source: PubMed Central journal article supplement (PMC4507803)

### KCs

### cluster 19 (Eubacterium rectale)

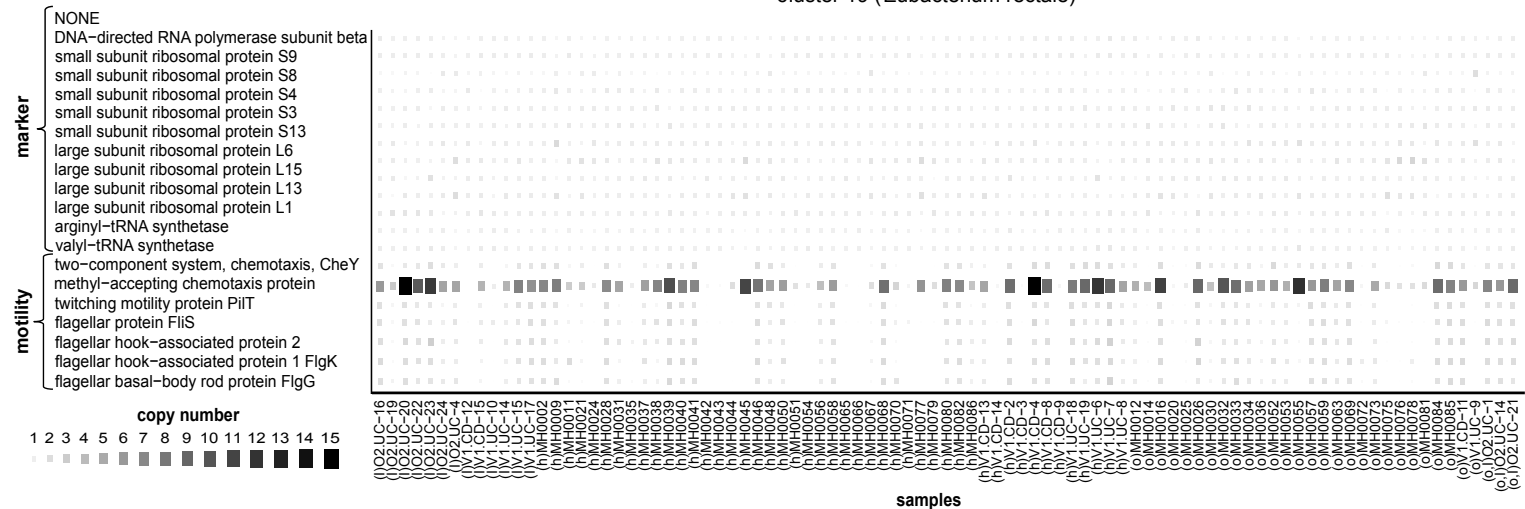

Supplement: NIHMS659678-supplement-Figure_S6.pdf [file NIHMS659678-supplement-Figure_S6.pdf]

A

cluster 10 (*Eubacterium siraeum*)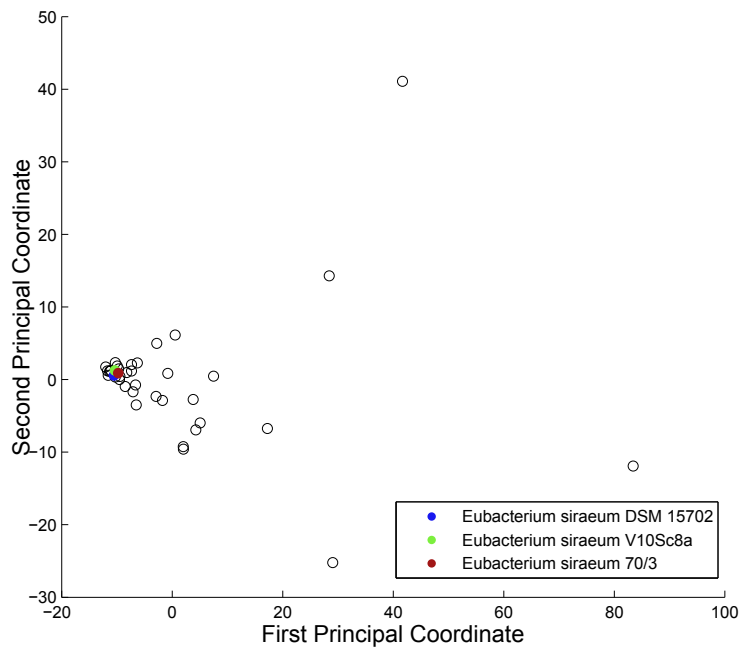

B

cluster 49 (*Clostridium* sp.)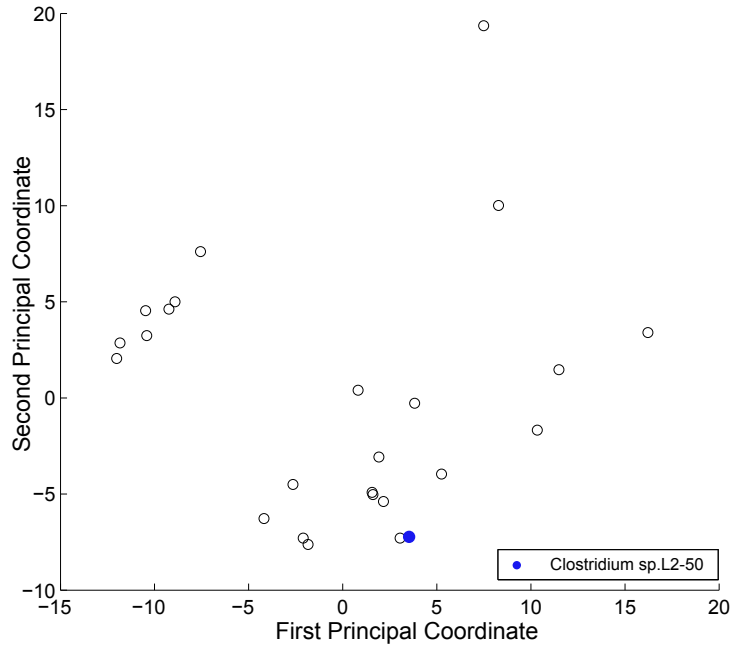

Supplement: NIHMS659678-supplement-Figure_S7.pdf [file NIHMS659678-supplement-Figure_S7.pdf]
